# Supplementary material
Source: publisher figshare collection journal article supplement (https://tandf.figshare.com/ndownloader/files/20418585)
Supplement: Supplementary file 1 [file 20418585]

**SUPPLEMENTARY MATERIAL**

**Impact of agricultural land use on the physicochemical properties of soils developed on sedimentary rocks in Malaysia**

Mum-Keng Wong, Paramananthan Selliah, Tham-Fatt Ng, Meor Hakif Amir Hassan, Eric Van Ranst & Kazuyuki Inubushi


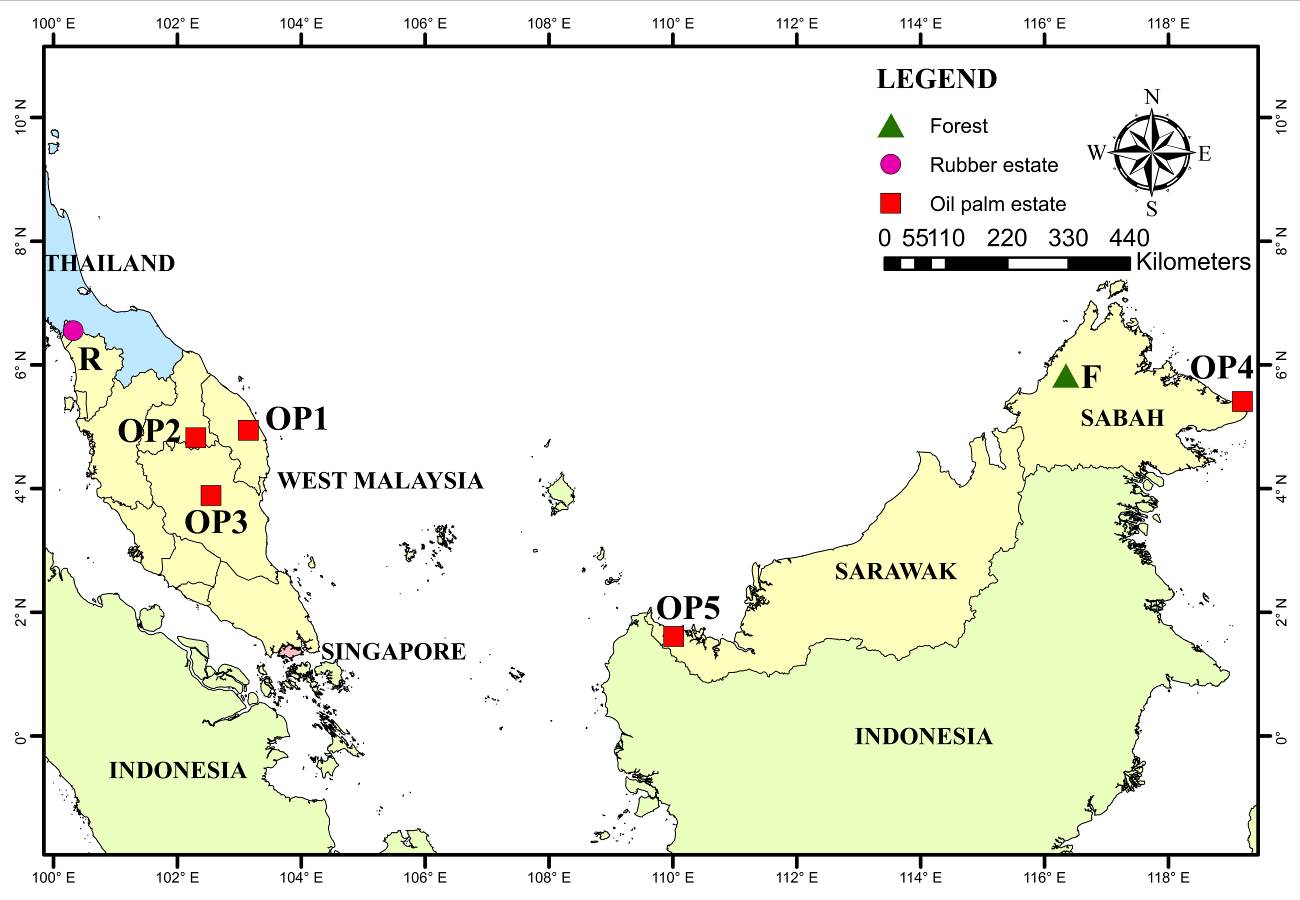


**Figure S1.** Location of study sites in Malaysia showing forest, rubber and oil palm plantation.

**Table S1.** List of soil sample numbers for Figure 1.

| Soil profile | Soil sample numbers | | |
| --- | --- | --- | --- |
|  | A(p/h)/Om | B(t1) | B(t2)/C |
| P1 | 1 | 2 | 3 |
| P2 | 4 | 5 | 6 |
| P3 | 7 | 8 | 9 |
| P4 | 10 | 11 | 12 |
| P5 | 13 | 14 | 15 |
| P6 | 16 | 17 | 18 |
| P7 | 19 | 20 | 21 |
| P8 | 22 | 23 | 24 |
| P9 | 25 | 26 | 27 |
| P10 | 28 | 29 | 30 |
| P11 | 31 | 32 | 33 |
| P12 | 34 | 35 | 36 |
| P13 | 37 | 38 | 39 |
| P14 | 40 | 41 | 42 |
| P15 | 43 | 44 | 45 |
| P16 | 46 | 47 | 48 |
| P17 | 49 | 50 | 51 |
| P18 | 52 | 53 | 54 |
| P19 | 55 | 56 | 57 |
| P20 | 58 | 59 | 60 |
| P21 | 61 | 62 | 63 |
| P22 | 64 | 65 | 66 |
| P23 | 67 | 68 | 69 |
| P24 | 70 | 71 | 72 |
| P25 | 73 | 74 | 75 |
